# Supplementary material for: Vascular Shutdown by Photodynamic Therapy Using Talaporfin Sodium
Source: PubMed Central journal article supplement (PMC7563359; doi:10.3390/cancers12092369), 2020-08-21

# Vascular Shutdown by Photodynamic Therapy Using Talaporfin Sodium

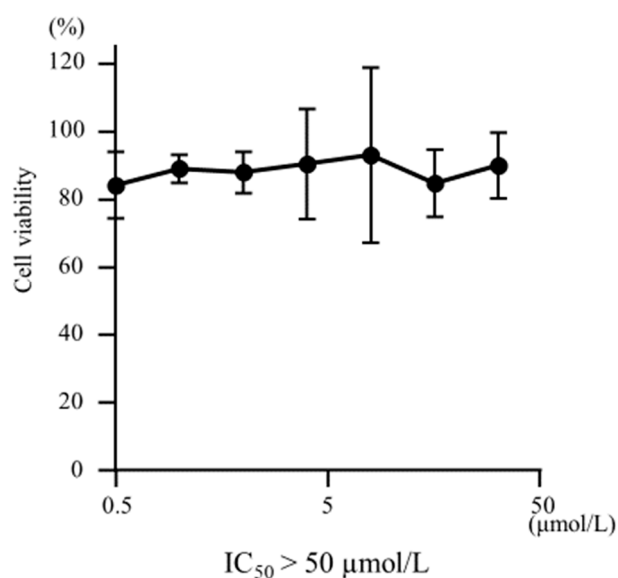

**Figure S1.** Changes in cell viability after treatment with the drug (without irradiation).

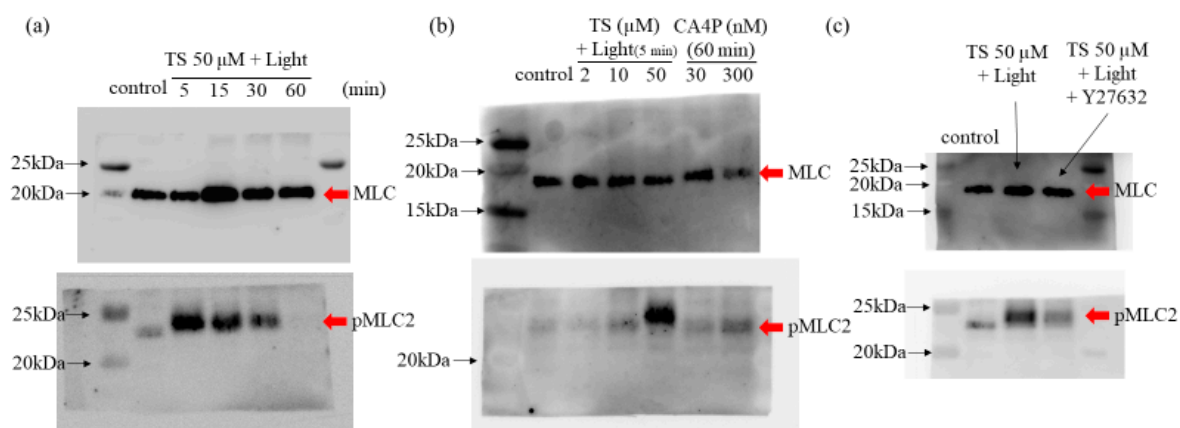

**Figure S2.** Whole western blots (uncropped blots) showing all the bands with molecular weight markers. (a), (b) and (c) belong to Figure 4a, Figure 4c, and Figure 5b.

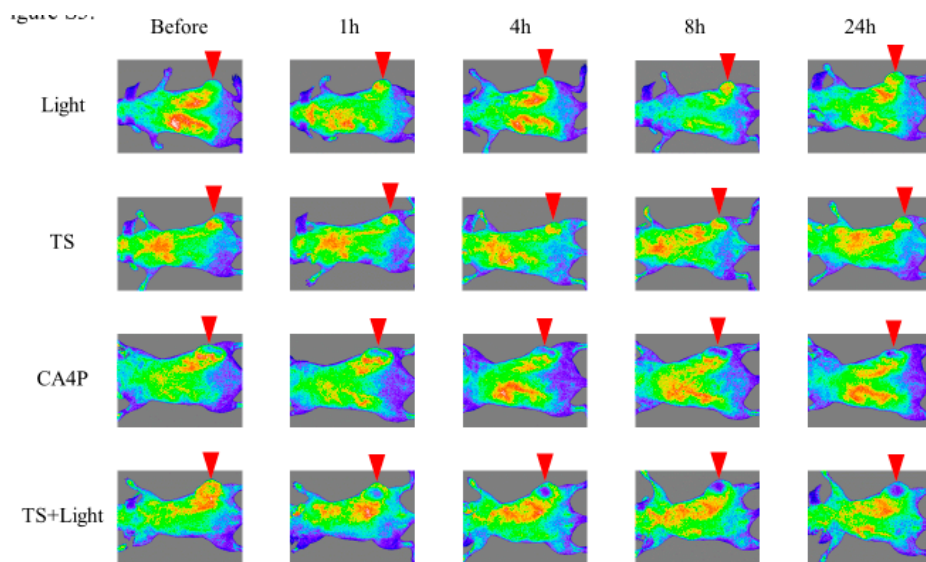

**Figure S3.** Laser speckle blood flow image showing the in vivo antivascular effects of TS-PDT on HCT116 xenografts in nude mice.

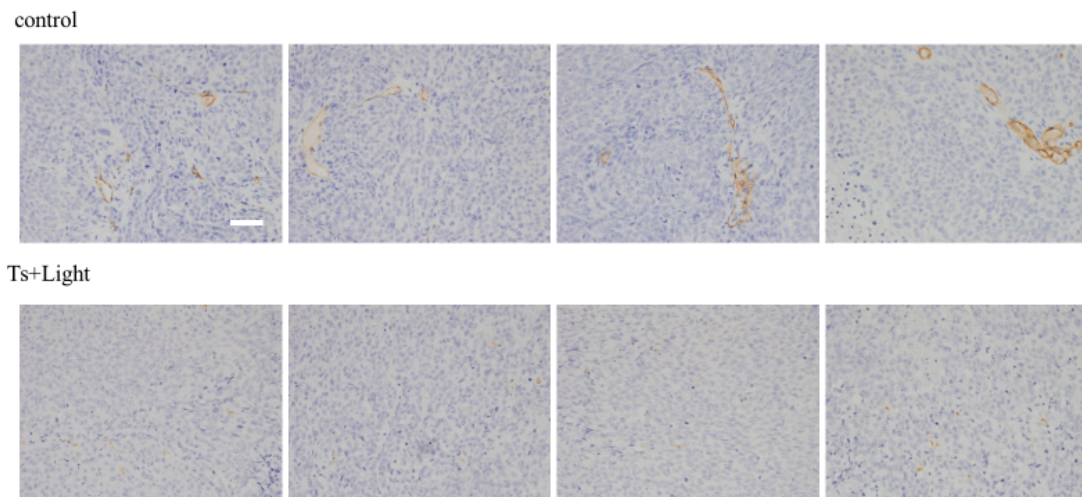

**Figure S4.** Pathological expression of CD31 in vivo revealing the antivascular effects of TS-PDT. (original magnification, 200 $\times$ ; scale bar, 50  $\mu$ m)

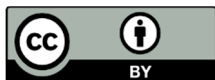

Supplement: cancers-12-02369-s001.pdf [file cancers-12-02369-s001.pdf]
